# Supplementary material for: Expanding the Plant GSTome Through Directed Evolution: DNA Shuffling for the Generation of New Synthetic Enzymes With Engineered Catalytic and Binding Properties
Source: PubMed Central journal article supplement (PMC6284010; doi:10.3389/fpls.2018.01737), 2018-11-30
Supplement: Image_2.pdf [file Image_2.pdf]

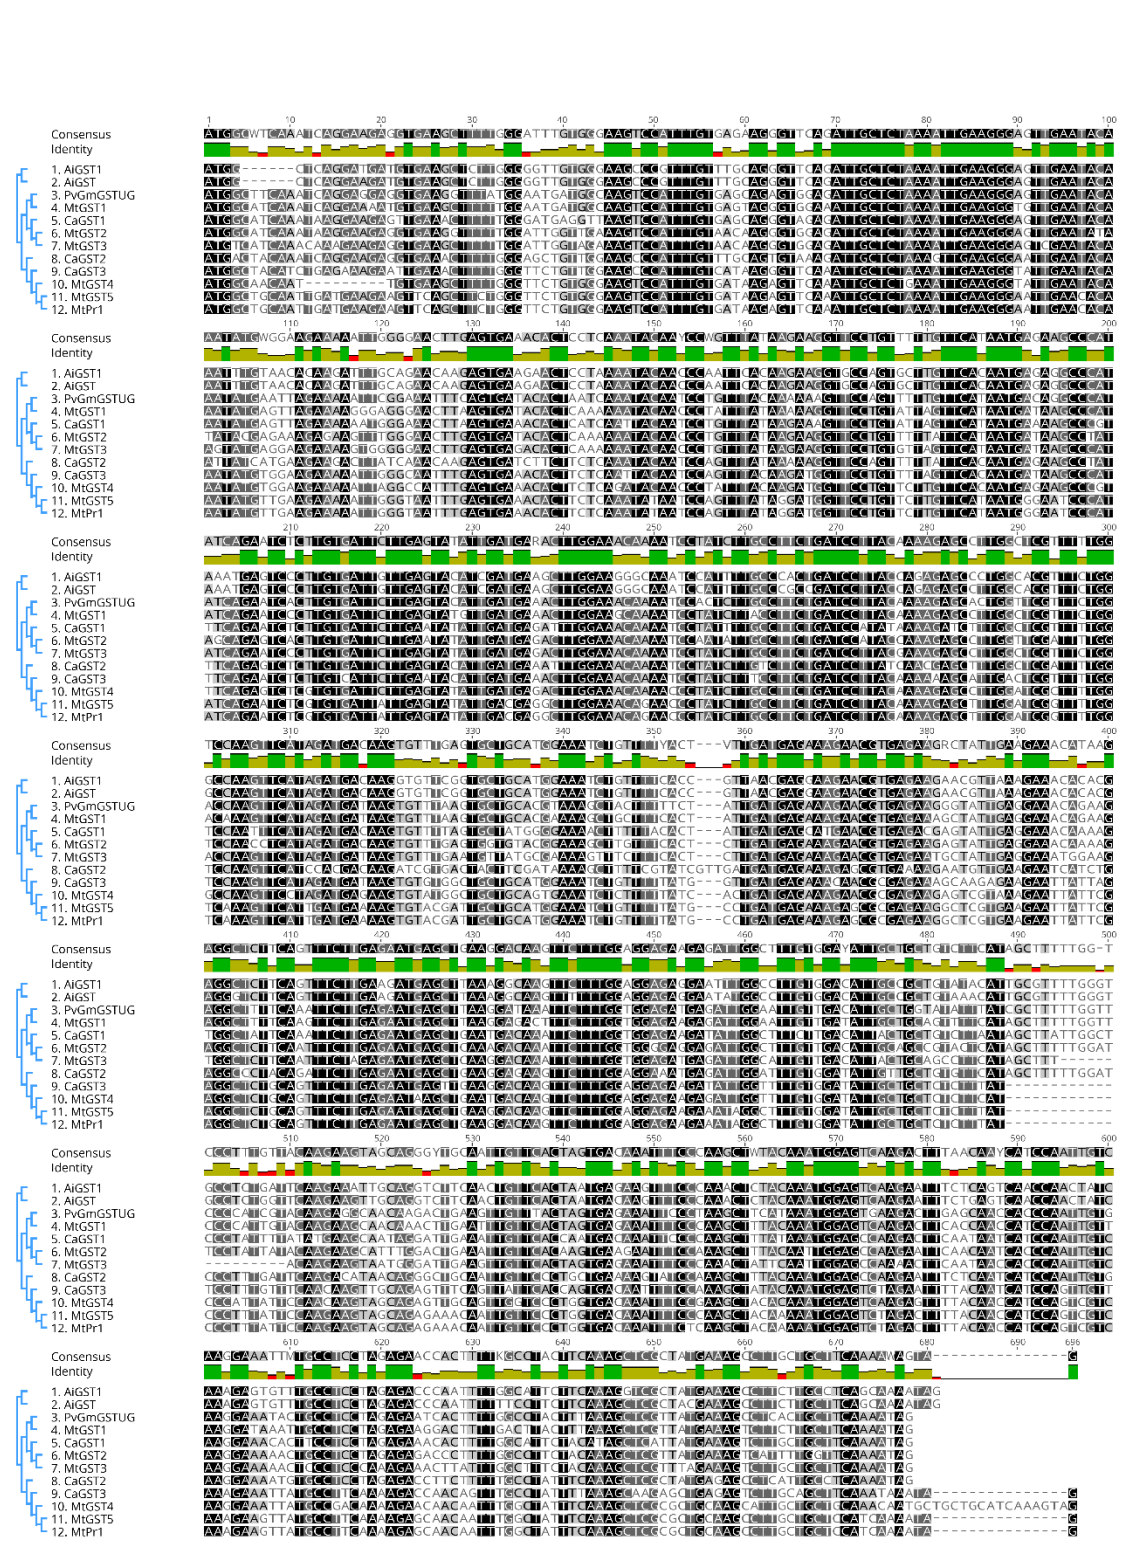

Supplementary Figure 2. Nucleotide sequence alignments of PvGmGSTUG with the first 12 sequences identified following BLASTP search (Clustal Omega; Sievers et al., 2011). The figure was created using Geneious v9.1.2 software (Kearse et al., 2012). Conserved areas are shown shaded: ■ 100% identity, ■ 80-100% identity, ■ 60-80% identity, <60% identity. The accession numbers of the sequences that were used were: *MtGST1*, (*Medicago truncatula*, XM\_003623148.2); *CaGST1*,

(*Cicer arietinum*, XM\_004492319.2); *MtGST2*, (*Medicago truncatula*, XM\_003623126.2); *MtGST3*, (*Medicago truncatula*, XM\_003623120.2); *CaGST2*, (*Cicer arietinum*: KT336759.1); *CaGST3*, (*Cicer arietinum*, XM\_012713550.1); *MtGST4*, (*Medicago truncatula*, XM\_003623159.1); *MtGST5*, (*Medicago truncatula*, XM\_003623156.2); *MtPr1*, (*Medicago truncatula*: BT053471.1); *AiGST1* (*Arachis ipaensis*: XM\_016342954.2); *AiGST2* (*Arachis ipaensis*: XM\_016333558.2).
