# Supplementary material for: Expanding the Plant GSTome Through Directed Evolution: DNA Shuffling for the Generation of New Synthetic Enzymes With Engineered Catalytic and Binding Properties
Source: PubMed Central journal article supplement (PMC6284010; doi:10.3389/fpls.2018.01737), 2018-11-30
Supplement: Image_3.pdf [file Image_3.pdf]

**A**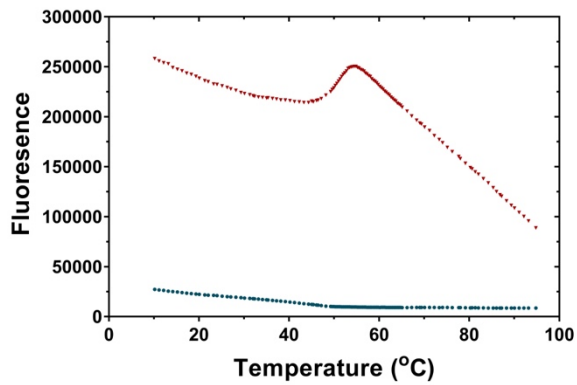**B**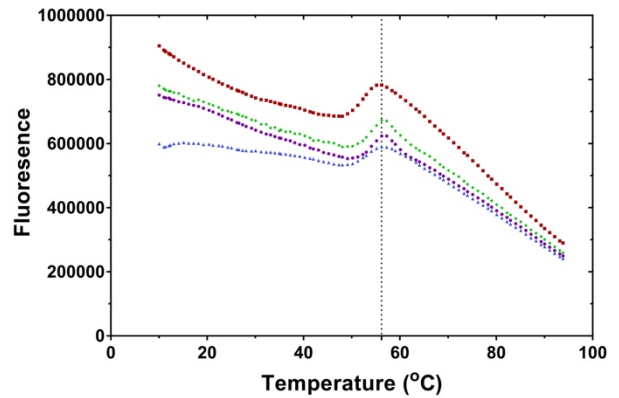**C**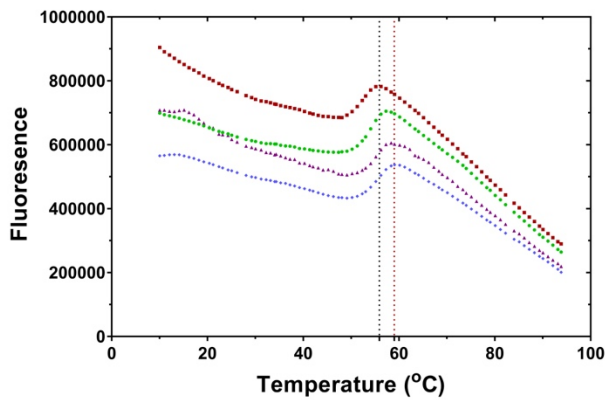

**Supplementary Figure 3. Thermal inactivation curves for *PvGmGSTUG*** **A.** Thermal denaturation curve (upper line) for *PvGmGSTUG* (1.43  $\mu\text{g}$ ) using differential scanning fluorimetry and response of control sample (lower line) **B.** Thermal denaturation curve for *PvGmGSTUG* (1.43  $\mu\text{g}$ ) in the absence (red line) or presence of GSH (green: 0.1 mM, purple: 0.5 mM, blue: 1 mM) using differential scanning fluorimetry. **C.** Thermal denaturation curve for *PvGmGSTUG* (1.43  $\mu\text{g}$ ) in the absence (red line) or presence of S-(p-nitrobenzyl)-GSH (green: 0.1 mM, purple: 0.5 mM, blue: 1 mM) using differential scanning fluorimetry.
